# Supplementary material
Source: PubMed Central journal article supplement (PMC1861827)
Supplement: NIHMS17311-supplement-legends.pdf [file NIHMS17311-supplement-legends.pdf]

### **Supplemental Figure Legends**

**Figure S1** LNF treatment alters microtubule morphology in lung cancer cell lines. (A) Immunofluorescence of  $\alpha$ -tubulin in A549 and H1299 human lung cancer cells treated with varying doses of LNF or PTX for 48 hrs. Microtubules bundles are designated with white arrows. (B) Transmission electron microscopy was performed on A549 cells fixed after 48 hrs of drug treatment. Microtubule bundling is indicated with black arrows. Insets are higher magnification of bundling. Scale bars are 1  $\mu$ m except for insets, which have 0.1  $\mu$ m scale bars.

**Figure S2** LNF and/or PTX do not affect the function of other HDACs. Western blotting of acetylated histone H3 after 16 hr treatment with LNF and PTX, both alone and in combination. TSA was used as a control since it is a known pan-HDAC inhibitor. Actin is shown as a loading control.
