# Supplementary material
Source: PubMed Central journal article supplement (PMC1861827)
Supplement: NIHMS17311-supplement-TableS1.pdf [file NIHMS17311-supplement-TableS1.pdf]

Table S1

| Treatment               | IC <sub>50</sub> ± SD | % Decrease in IC <sub>50</sub><br>relative to PTX or<br>DTX alone |
|-------------------------|-----------------------|-------------------------------------------------------------------|
| Tubacin                 | > 1 mM                | -                                                                 |
| PTX                     | 7.7 ± 1.7 μM          | -                                                                 |
| Tubacin (3.3 μM ) + PTX | 6.1 ± 1.5 μM          | 20.8                                                              |
| Tubacin (10 μM ) + PTX  | 5.3 ± 1.5 μM          | 31.1                                                              |
| DTX                     | 2.1 ± 0.9 μM          | -                                                                 |
| Tubacin (3.3 μM ) + DTX | 1.4 ± 0.6 μM          | 33.3                                                              |
| Tubacin (10 μM ) + DTX  | 1.5 ± 0.7 μM          | 28.6                                                              |
