# Supplementary material
Source: PubMed Central journal article supplement (PMC1861827)

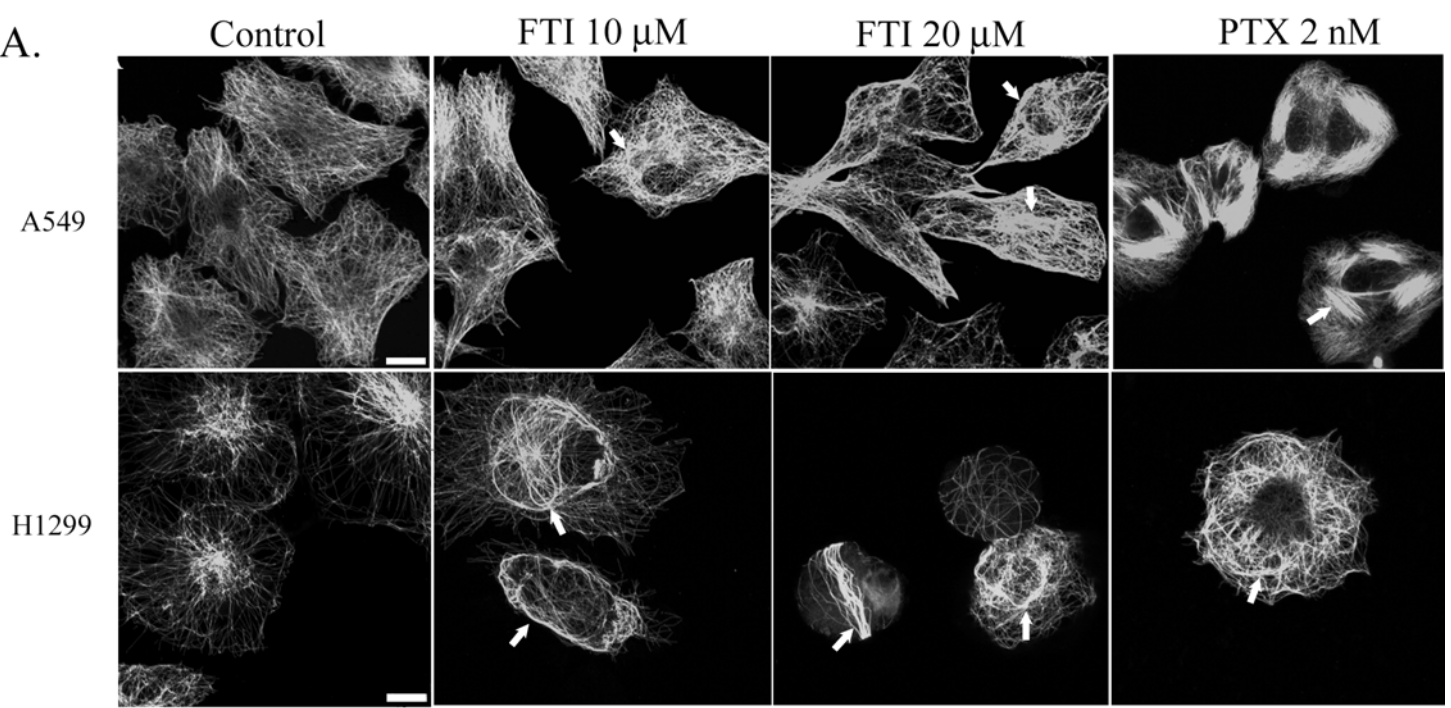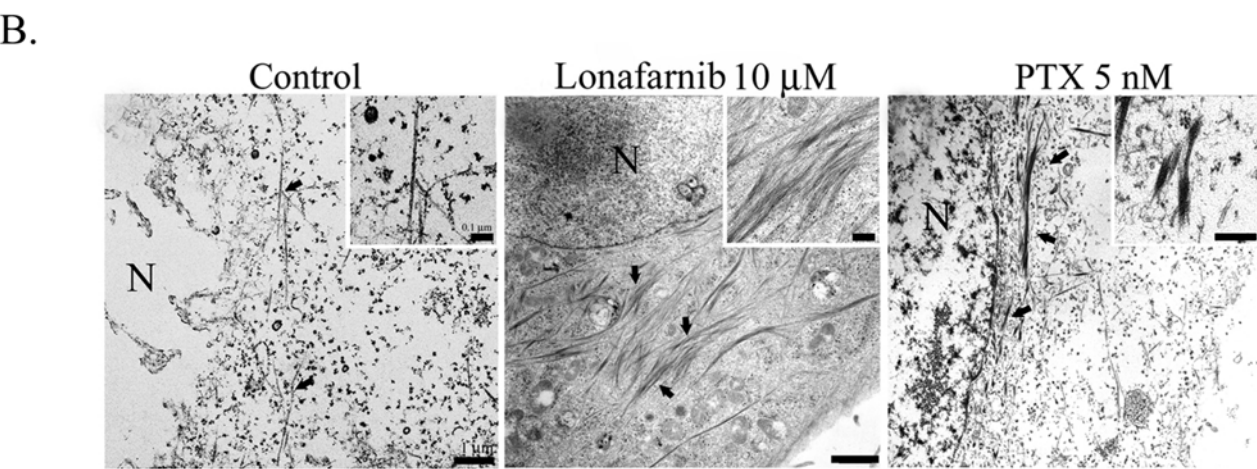

Supplement: NIHMS17311-supplement-FigS1.pdf [file NIHMS17311-supplement-FigS1.pdf]

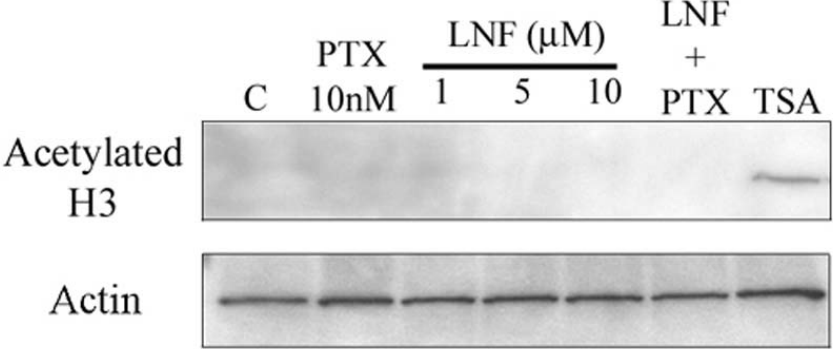

Supplement: NIHMS17311-supplement-FigS2.pdf [file NIHMS17311-supplement-FigS2.pdf]
